# Supplementary material for: Molecularly imprinted polymer-capped nitrogen-doped graphene quantum dots as a novel chemiluminescence sensor for selective and sensitive determination of doxorubicin
Source: Royal Society of Chemistry journal article supplement (doi:10.1039/c6ra18184h), 2016-01-01
Supplement: c6ra18184h1.pdf [file c6ra18184h1.pdf]

## **Electronic Supplementary Information**

### **Molecularly Imprinted Polymer-Capped Nitrogen-Doped Graphene Quantum Dots as a Novel Chemiluminescence Sensor for Selective and Sensitive Determination of Doxorubicin**

Mohammad Amjadi\* and Roghayeh Jalili

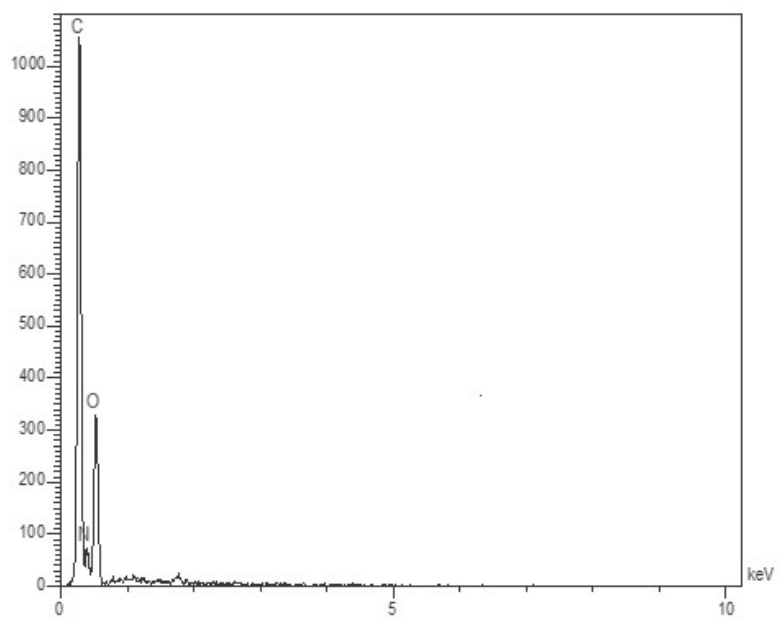

**Fig.S1.** EDX spectrum of NGQDs.

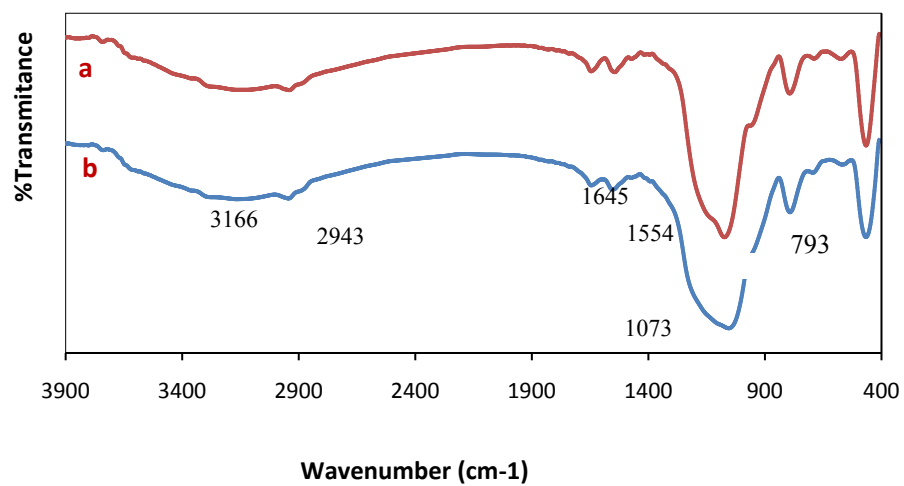

**Fig.S2.** FT-IR spectra of MIP@NGQDs(a) and MIP@NGQDs(b)

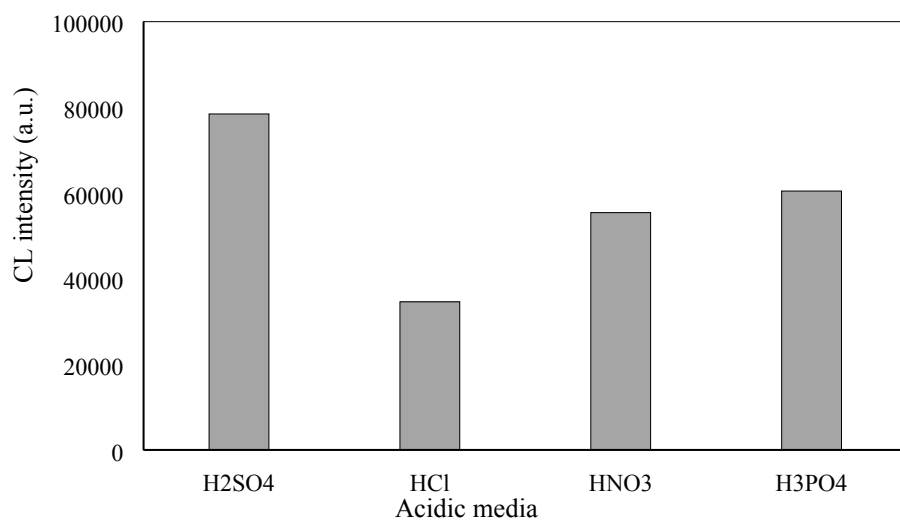

**Fig. S3.** Optimization of acidic media, reaction conditions: (0.5 Mmol/L of H<sub>2</sub>SO<sub>4</sub>, HCl, HNO<sub>3</sub>, H<sub>3</sub>PO<sub>4</sub>). MIP@NGQDs, 12.5 mg L<sup>-1</sup>, KMnO<sub>4</sub>, 0.5 mM.

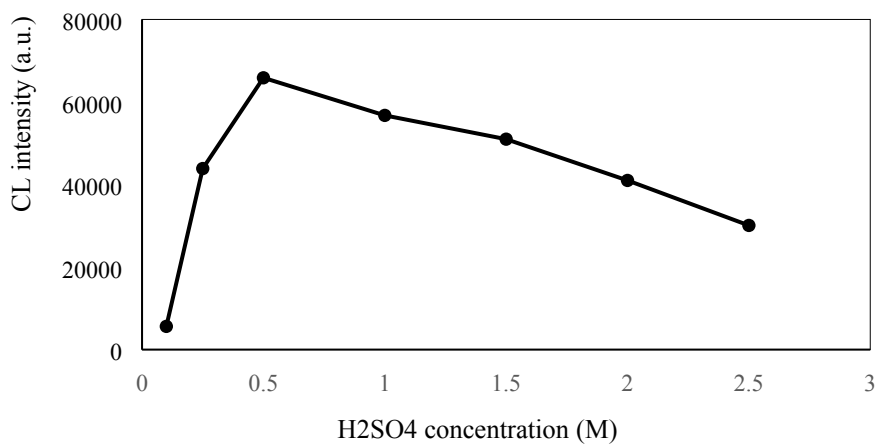

**Fig.S4.** Optimization of H<sub>2</sub>SO<sub>4</sub> concentration. .Conditions: MIP@NGQDs, 12.5 mg L<sup>-1</sup>, KMnO<sub>4</sub>, 0.5 mM.

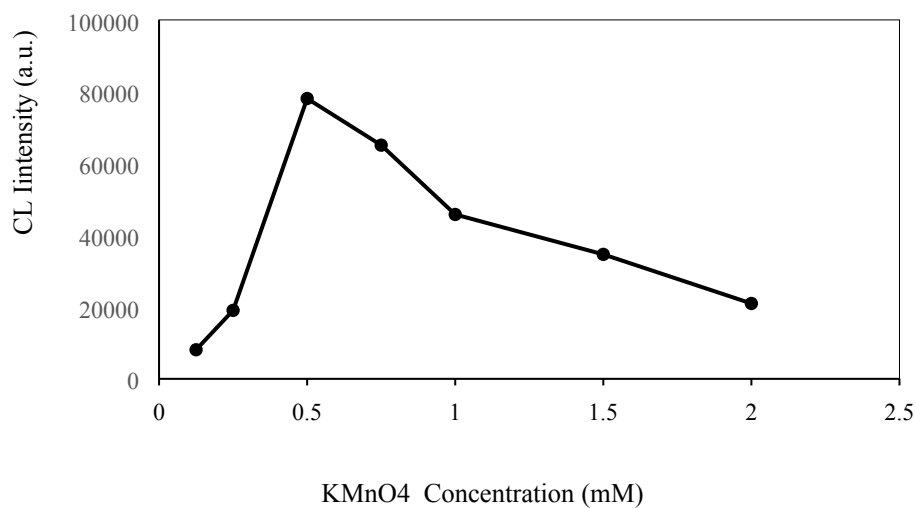

**Fig.S5.** Optimization of KMnO<sub>4</sub> concentration. Conditions: MIP@NGQDs, 12.5 mg L<sup>-1</sup>, H<sub>2</sub>SO<sub>4</sub>, 0.5 M.

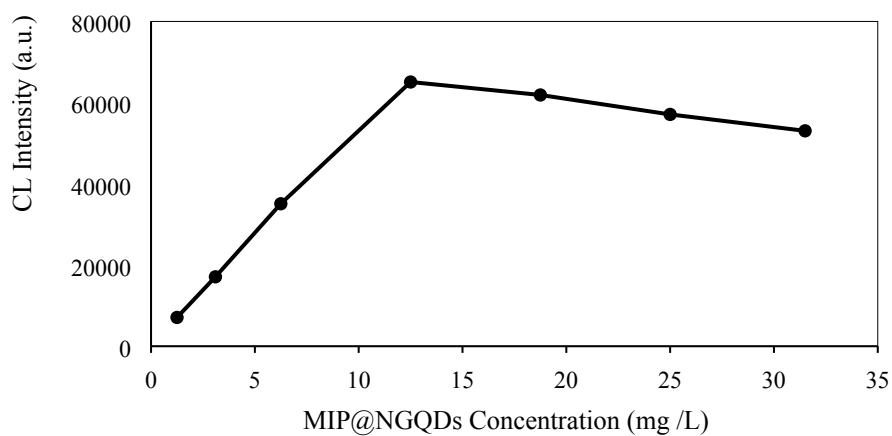

**Fig.S6.** Optimization of MIP@NGQDs concentration..Conditions: KMnO<sub>4</sub>, 0.5 mM, H<sub>2</sub>SO<sub>4</sub>, 0.5 M.

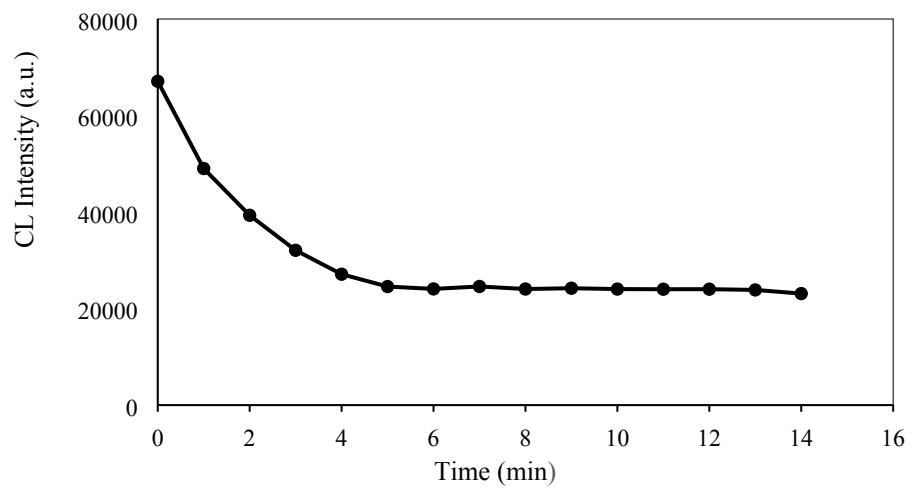

**Fig. S7.** Kinetic uptake of DOX molecules on to MIP@NGQDs. The concentration of DOX was  $100 \mu\text{g L}^{-1}$ . Conditions: DOX,  $100 \mu\text{g L}^{-1}$ , MIP@NGQDs,  $12.5 \text{ mg L}^{-1}$ ,  $\text{H}_2\text{SO}_4$ ,  $0.5 \text{ M}$ ,  $\text{KMnO}_4$ ,  $0.5 \text{ mM}$ .

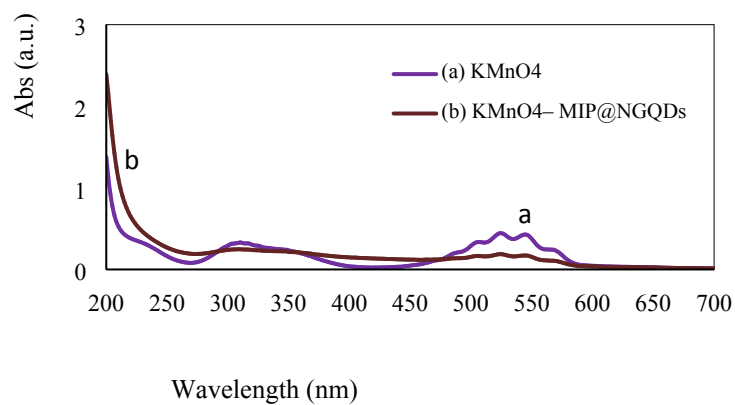

**Fig.S8.** UV-vis absorption spectra of the  $\text{KMnO}_4$ - MIP@NGQDs CL system measured (a) before and (b) after the CL reaction (recorded 30 sec after mixing). Conditions: MIP@NGQDs,  $25 \text{ mg L}^{-1}$ ,  $\text{H}_2\text{SO}_4$ , 1M,  $\text{KMnO}_4$ , 1 mM.

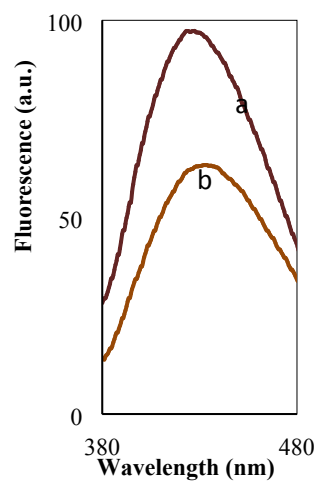

**Fig.S9.** Fluorescence emission spectra of MIP@NGQDs before (a) and after addition of 0.5 mg L<sup>-1</sup> of DOX (b). Conditions:  $\lambda_{ex} = 360$  nm, MIP@NGQDs 12.5 mg L<sup>-1</sup>.
